# Supplementary material for: Anchoring IgG-degrading enzymes to the surface of platelets selectively neutralizes antiplatelet antibodies
Source: PubMed Central journal article supplement — Blood Adv. 2022 Jun 26;6(15):4645–56. doi: 10.1182/bloodadvances.2022007195 (PMC9636316; doi:10.1182/bloodadvances.2022007195), 2022-06-26
Supplement: mmc1.pdf [file mmc1.pdf]

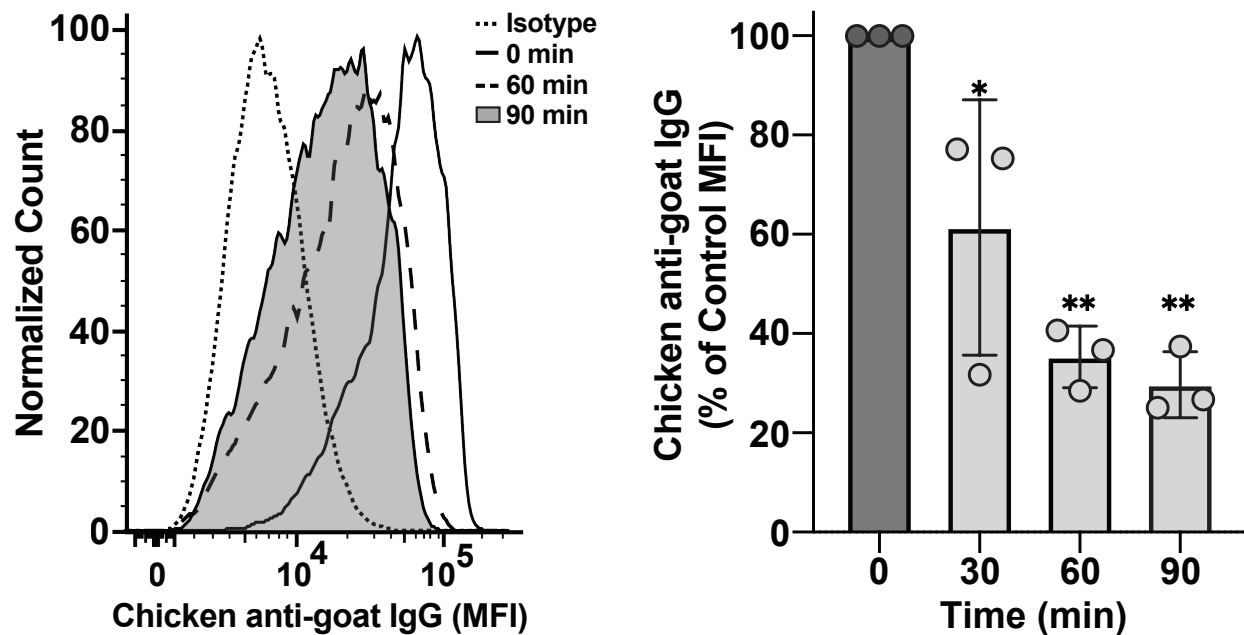

**Supplemental Figure 1: The cross-linking of platelet Fc $\gamma$ RIIA causes receptor internalization.** To cross-link Fc $\gamma$ RIIA, human platelets were incubated with a mouse monoclonal antibody to Fc $\gamma$ RIIA (IV.3) and goat anti-mouse IgG antibodies for 20 minutes at room temperature. The antibody-treated platelets were incubated at 37°C for an additional 30, 60, or 90 minutes. The amount of surface-bound goat IgG was quantified by flow cytometry using a FITC-conjugated chicken anti-goat antibody. Data represent mean  $\pm$  SD. (One-way ANOVA; n = 3). \*P < 0.05, \*\*P < 0.01.

## A ADP

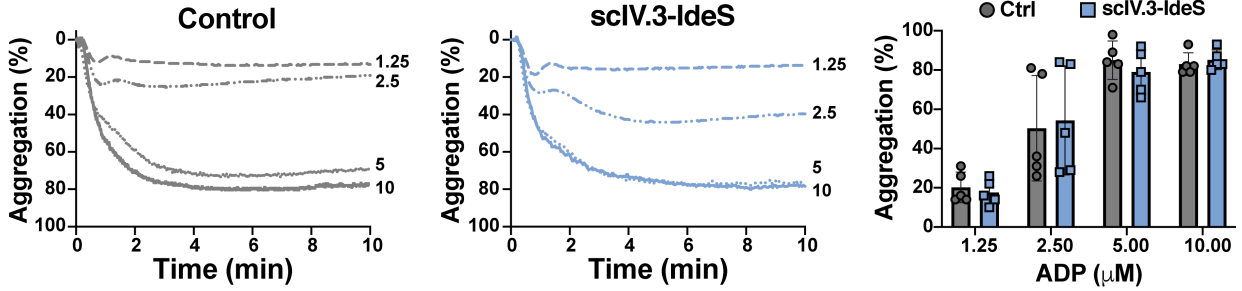

## B Collagen

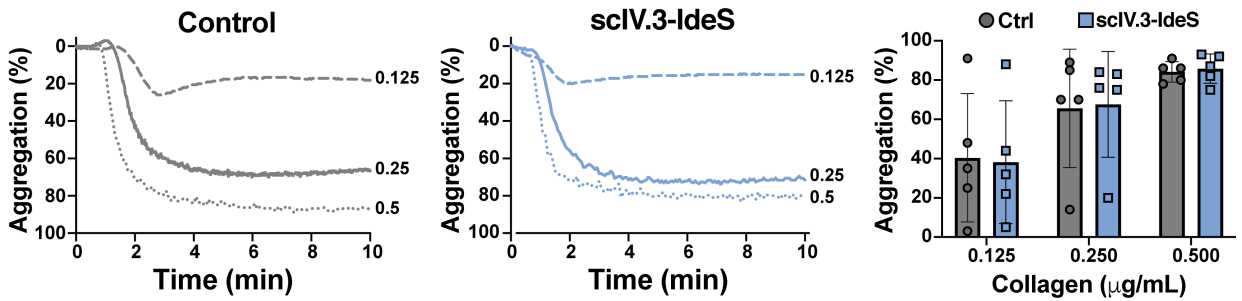

**Supplemental Figure 2: scIV.3-IdeS does not inhibit ADP or collagen-mediated platelet aggregation.** Platelet-rich plasma was treated with scIV.3-IdeS (20 nM) or control for 10 minutes and then stimulated with increasing concentrations of **A**) ADP (1.25 – 10  $\mu\text{M}$ ) or **B**) collagen (0.125 – 0.5  $\mu\text{g/mL}$ ). Data shown as mean  $\pm$  SD.
